# Supplementary material for: Electron-level insight into efficient synergistic oxygen evolution catalysis at multimetallic sites in PtNiFeCoCu high-entropy alloys
Source: Royal Society of Chemistry journal article supplement (doi:10.1039/d3cp04829b), 2023-01-01
Supplement: d3cp04829b1.pdf [file d3cp04829b1.pdf]

1 **Electron-level insight into efficient synergistic oxygen evolution**  
2 **catalysis at multimetallic sites in PtNiFeCoCu high-entropy alloys**

3 Sen Ming<sup>a</sup>, Kun Meng<sup>a,\*</sup>, Chengyi Hou<sup>a</sup>, Lei Qin<sup>a</sup>, Shitao Wang<sup>a</sup>, Ju Rong<sup>a</sup>, Xiaohua

4 Yu<sup>a</sup>, Hongying Hou<sup>a,\*</sup>

5 <sup>a</sup>Faculty of Materials Science and Engineering, Kunming University of Science and  
6 Technology, Kunming, 650093, China.

7 **E-mail addresses:** mkkmust@163.com, hongyinghou@kust.edu.cn

8

9 **Table S1.** A summary of HEA electrocatalysts with favorable OER catalytic activity

| Catalysts                     | Catalytic reaction | Reference |
|-------------------------------|--------------------|-----------|
| CoCrFeMnNi–P                  | HER 、 OER          | [1]       |
| CoFeLaNiPt                    | HER 、 OER          | [2]       |
| AlNiCoFeX<br>(X = Mo, Nb, Cr) | ORR 、 OER          | [3]       |
| NiCoFeMoMn                    | HER 、 OER          | [4]       |
| PtRuFeCoNi                    | ORR 、 OER          | [5]       |
| FeCoNiCuMn                    | HER 、 OER          | [6]       |

10

11

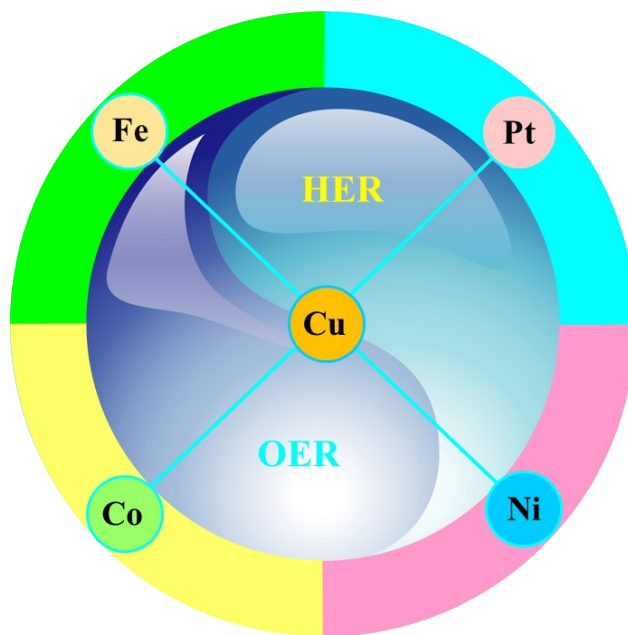

12

13

14

**Figure S1.** HEA Composition Schematic.

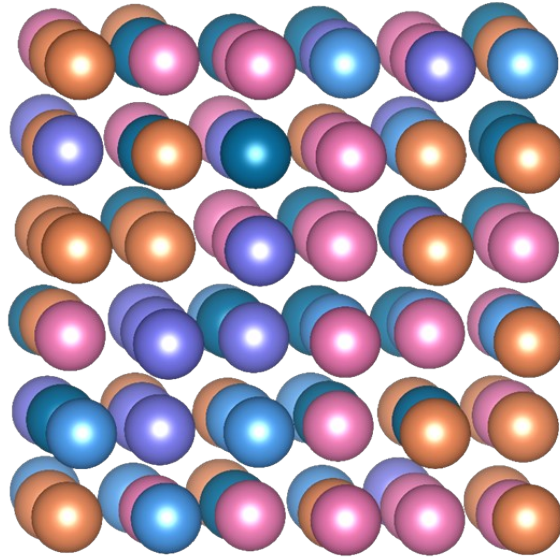

15

16

**Figure S2.** Optimized geometries of the PtNiFeCoCu HEA structure.

17

18

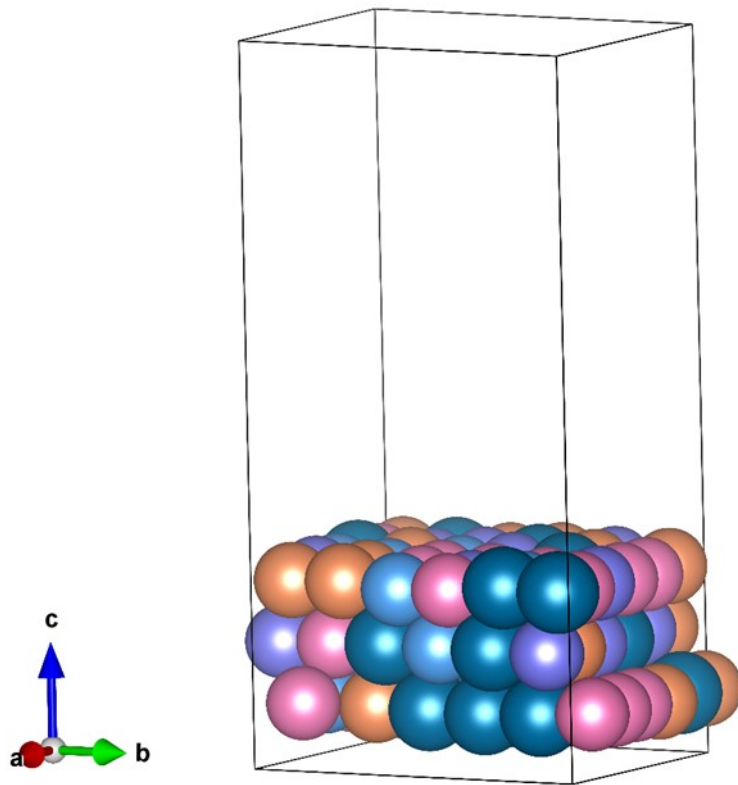

19

20 **Figure S3.** Chemical structure model of the PtNiFeCoCu HEA (111) surface.

21

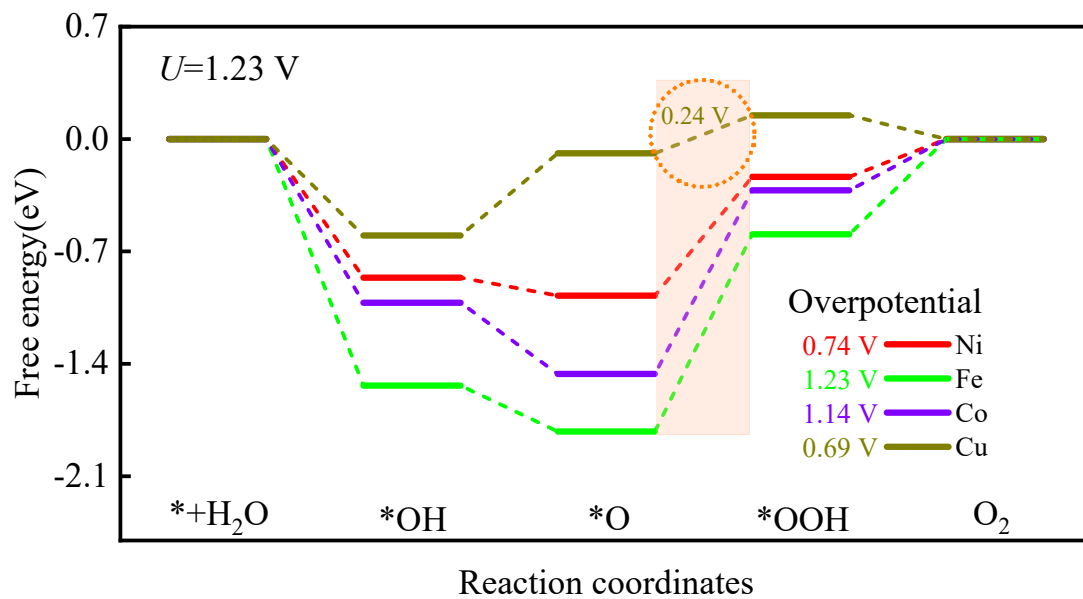

23

24 **Figure S4** Free energy landscape of the four metal sites of HEA (001) at equilibrium

25

potential ( $U = 1.23$  V).

26

27

28 **Table S2.** Charge contribution of individual metal sites during co-adsorption and the

29 charge acquired by \*O from the substrate.

| P-1              | Bader/e | P-2              | Bader/e |
|------------------|---------|------------------|---------|
| Ni <sub>22</sub> | -0.18   | Cu <sub>19</sub> | -0.21   |
| Ni <sub>13</sub> | -0.17   | Fe <sub>4</sub>  | -0.64   |
| Fe <sub>12</sub> | -0.52   | Fe <sub>7</sub>  | -0.65   |
| O                | 0.89    | O                | 0.93    |

30

31

## 32 *Calculation of HER energetics*

33 The total hydrogen evolution reaction can be written

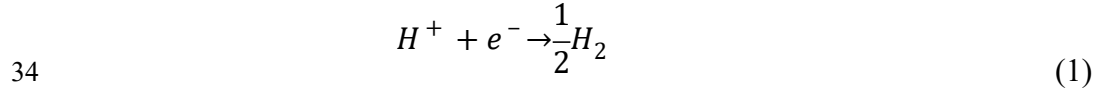

35 It takes place at an electrode supplying the electrons, and providing an  
36 intermediate state of the process:

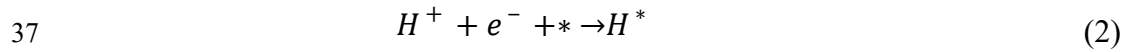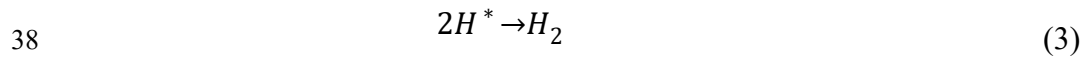

39 Where the \* denotes a site on the surface (so an \* by itself denotes a free site and H\*  
40 denotes a hydrogen atom adsorbed on the surface).

41 The free energies for hydrogen adsorption ( $\Delta G_{H^*}$ ) are calculated from the Eq. 4:

$$42 \quad \Delta G_{H^*} = \Delta E_{H^*} + \Delta ZPE - T\Delta S \quad (4)$$

43 Where the  $\Delta E_{H^*}$ ,  $\Delta ZPE$ ,  $T$  and  $\Delta S$  represent the binding energy, zeropoint energy  
44 change, temperature and entropy change of H adsorption system, respectively.

45 The vibration entropy is H at the adsorbed states is negligible. Thus,  $\Delta S$  can be  
46 obtained from the following Eq. 5:

$$47 \quad \Delta S = S_{H^*} - \frac{1}{2}S_{H_2} \approx -\frac{1}{2}S_{H_2} \quad (5)$$

48 Where  $S_{H_2}$  is the entropy of  $H_2$  in the gas phase at the standard conditions.

49 Besides,  $\Delta ZPE$  can be calculated from the Eq. 6:

$$50 \quad \Delta ZPE = ZPE_{H^*} - \frac{1}{2}ZPE_{H_2} \quad (6)$$

51 Thus, the free energy of the adsorbed state can be calculated using the simplified

52 Eq. 7[7]:



53 
$$\Delta G_{H^*} = \Delta E_{H^*} + 0.24eV \quad (7)$$

54 As illustrated in Figure S5, we randomly selected eight potential sites on the  
 55 PtNiFeCoCu HEA (111) surface and calculated their  $\Delta G_{H^*}$  values.  $\Delta G_{H^*}$  is a key  
 56 descriptor for evaluating the HER performance of electrocatalysts. As can be seen from  
 57 the figure, the  $\Delta G_{H^*}$  values of these eight active sites are all relatively low (around 0.3  
 58 eV). This indicates that the PtNiFeCoCu HEA (111) exhibits notable HER performance  
 59 under acidic conditions. In addition, there is a significant synergistic effect at multiple  
 60 sites in the second step of  $H^*$  adsorption/ $H_2$  desorption (Heyrovsky step).

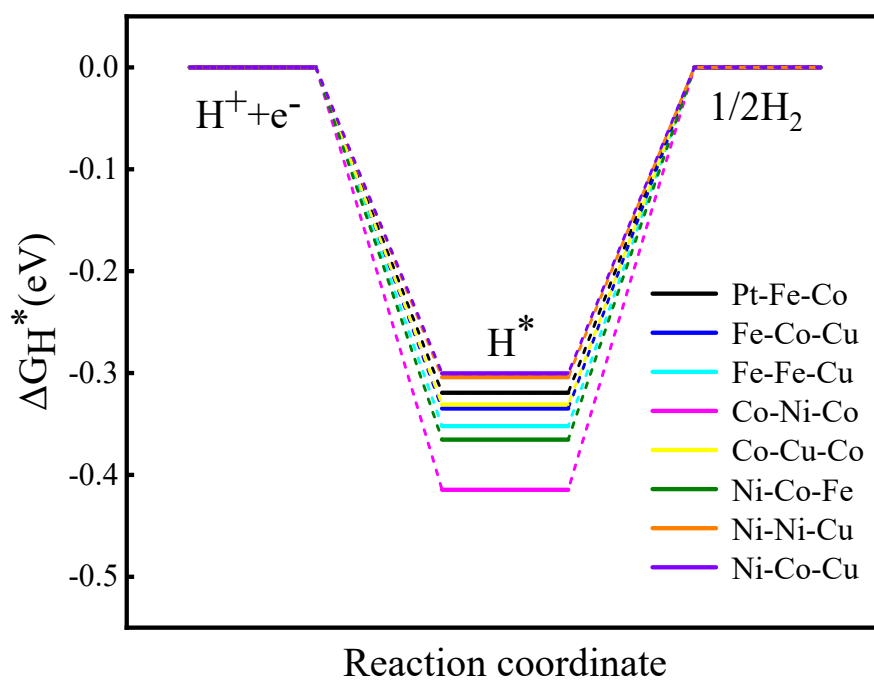

62 **Figure S5** Free energy ( $\Delta G_{H^*}$ ) diagram for HER at different catalytic sites on the

63 PtNiFeCoCu HEA (111) surface at  $U=0$ ,  $pH=0$ .

64

## 65 **References**

66 [1] Zhao X, Xue Z, Chen W, et al. Eutectic synthesis of high-entropy metal phosphides  
67 for electrocatalytic water splitting[J]. *ChemSusChem*, 2020, 13(8): 2038-2042.

68 [2] Glasscott M W, Pendergast A D, Goines S, et al. Electrosynthesis of high-entropy  
69 metallic glass nanoparticles for designer, multi-functional electrocatalysis[J]. *Nature*  
70 *Communications*, 2019, 10(1): 2650.

71 [3] Fang G, Gao J, Lv J, et al. Multi-component nanoporous alloy/(oxy) hydroxide for  
72 bifunctional oxygen electrocatalysis and rechargeable Zn-air batteries[J]. *Applied*  
73 *Catalysis B: Environmental*, 2020, 268: 118431.

74 [4] Liu H, Qin H, Kang J, et al. A freestanding nanoporous NiCoFeMoMn high-entropy  
75 alloy as an efficient electrocatalyst for rapid water splitting[J]. *Chemical Engineering*  
76 *Journal*, 2022, 435: 134898.

77 [5] Zhang P, Hui X, Nie Y, et al. New Conceptual Catalyst on Spatial High-Entropy  
78 Alloy Heterostructures for High-Performance Li-O<sub>2</sub> Batteries[J]. *Small*, 2023, 19(15):  
79 2206742.

80 [6] Zhu H, Sun S, Hao J, et al. A high-entropy atomic environment converts inactive to  
81 active sites for electrocatalysis[J]. *Energy & Environmental Science*, 2023, 16(2): 619-  
82 628.

83 [7] Nørskov J K, Bligaard T, Logadottir A, et al. Trends in the exchange current for  
84 hydrogen evolution[J]. *Journal of The Electrochemical Society*, 2005, 152(3): J23.
